# Supplementary material for: Gut Microbiota-Mediated Personalized Treatment of Hyperlipidemia Using Berberine
Source: PubMed Central journal article supplement — Theranostics. 2017 Jun 24;7(9):2443–51. doi: 10.7150/thno.18290 (PMC5525748; doi:10.7150/thno.18290), 2017-06-24

# **Gut microbiota-mediated personalized treatment for hyperlipidemia using berberine**

Yan Wang<sup>1,\*,#</sup>, Qian Tong<sup>2#</sup>, Jia-Wen Shou<sup>1#</sup>, Zhen-Xiong Zhao<sup>1</sup>, Xiao-Yang Li<sup>1</sup>,  
Xian-Feng Zhang<sup>2</sup>, Shu-Rong Ma<sup>1</sup>, Chi-Yu He<sup>1</sup>, Yuan Lin<sup>1</sup>, Bao-Ying Wen<sup>1</sup>, Fang Guo<sup>1</sup>,  
Jie Fu<sup>1</sup>, Jian-Dong Jiang<sup>1\*</sup>

<sup>1</sup> State Key Laboratory of Bioactive Substance and Function of Natural Medicines, Institute of Materia Medica, Chinese Academy of Medical Sciences / Peking Union Medical College, Beijing 100050, China; <sup>2</sup> The First Hospital of Jilin University, Changchun, 130021

# These authors made an equal contribution to this work.

\* Corresponding author: Dr. Yan Wang, Tel.: +86 10 63165238; fax, +86 10 63165238.

E-mail address: [wangyan@imm.ac.cn](mailto:wangyan@imm.ac.cn); or Dr. Jian-Dong Jiang, Tel.: +86 10 83160005;

fax, +86 10 63017757. E-mail address: [jiang.jdong@163.com](mailto:jiang.jdong@163.com).

## **Supplementary information**

### **Figure legends**

**Supplementary Figure 1:** Chemical structure of BBR and its main metabolites.

**Supplementary Figure 2:** Concentration of BBR main metabolites, M1-M5, in the small intestines of the HFD-fed or ND-fed hamsters ( $P < 0.05$ ;  $n = 5$  for the ND-fed and  $n = 6$  for the HFD-fed hamsters).

**Supplementary Figure 3:** Concentration of BBR main metabolites M1-M5 in the livers of HFD-fed or ND-fed hamsters ( $P < 0.05$ ;  $n = 5$  for the ND-fed hamsters, and  $n = 6$  for the HFD-fed hamsters).

**Supplementary Figure 4:** Blood concentration of BBR in human subjects. No difference was observed in plasma BBR concentrations between male and female and between those above 50 and below 50 years old (*NS*: no significance).

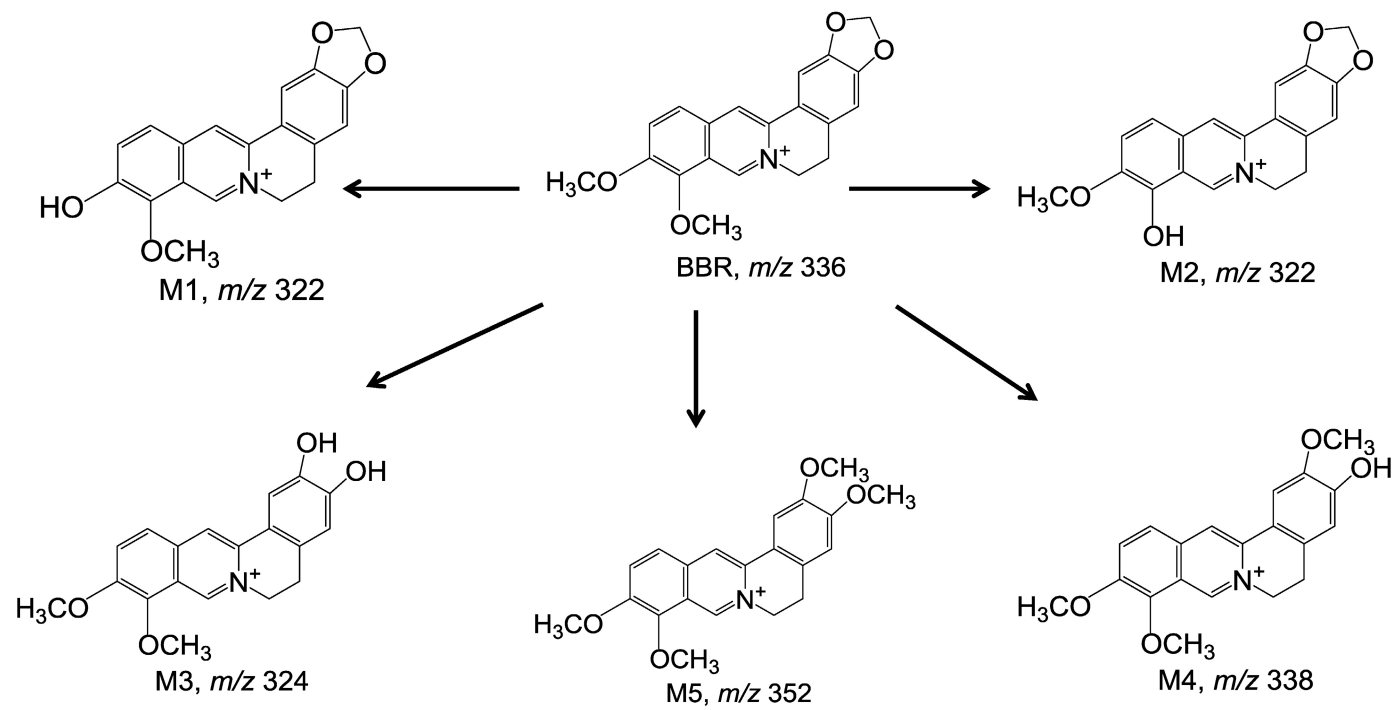

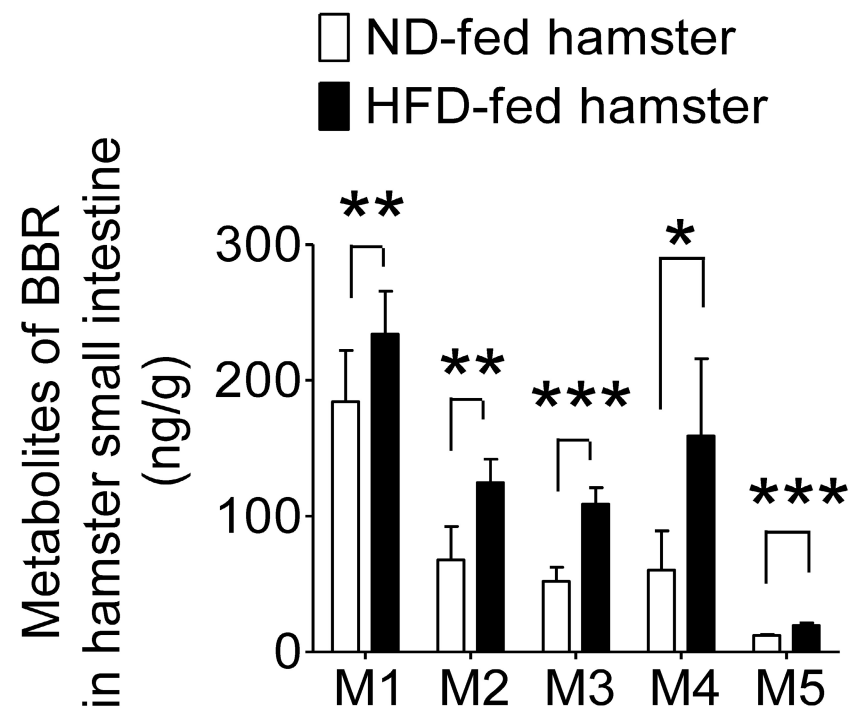

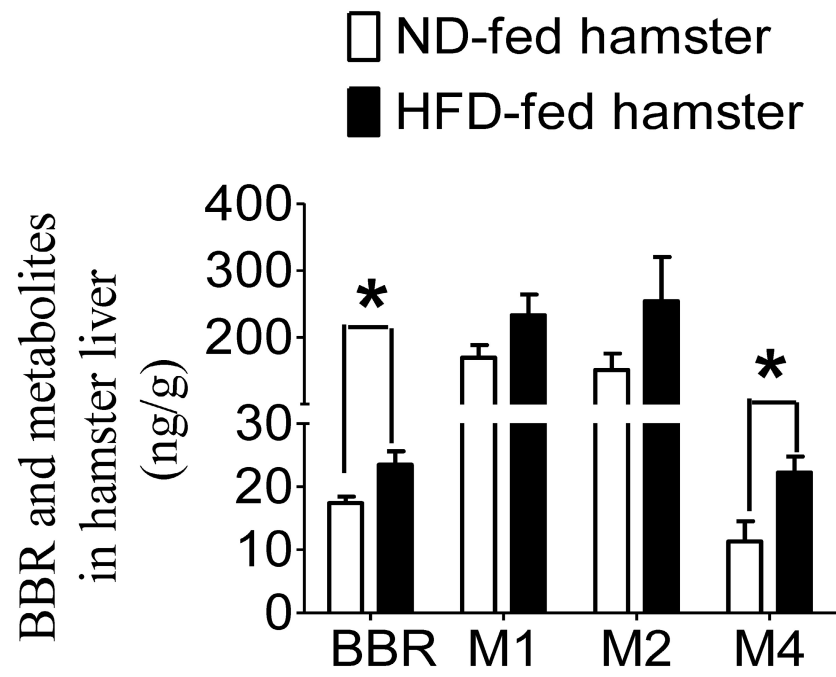

A

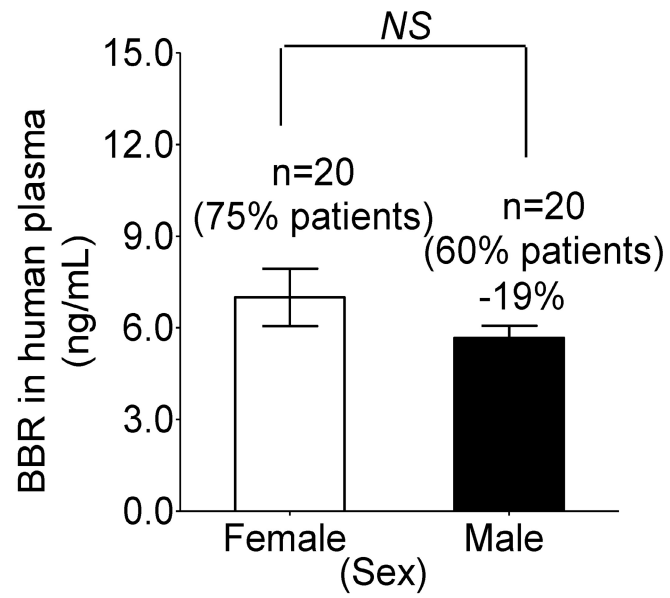

B

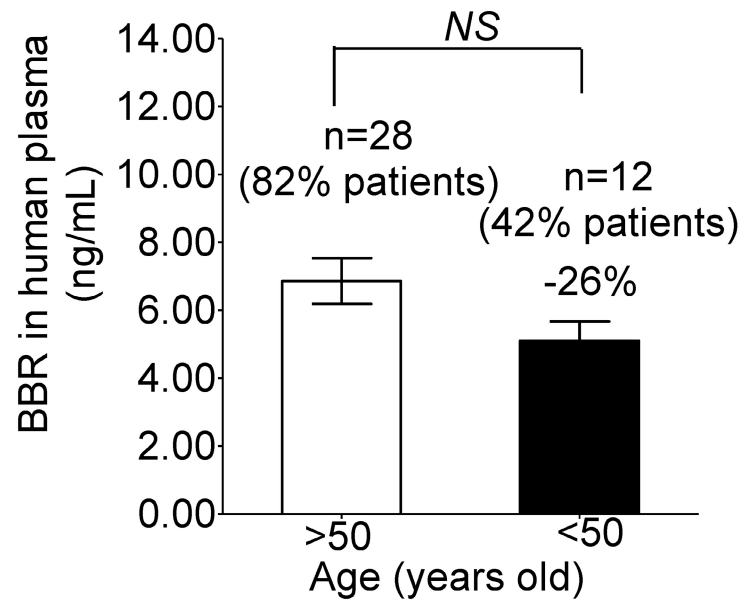

Supplement: thnov07p2443s1.pdf [file thnov07p2443s1.pdf]
